# Supplementary material for: Clitorienolactones and Isoflavonoids of Clitorea ternatea Roots Alleviate Stress-Like Symptoms in a Reserpine-Induced Zebrafish Model
Source: MDPI journal article supplement (doi:10.3390/molecules26144137), 2021-07-07
Supplement: s1 [file s1]

Supplementary Materials

# Cltorienolactones and Isoflavonoids of *Clitoria ternatea* Roots Alleviate Stress-Like Symptoms in Reserpine-Induced Zebrafish Model

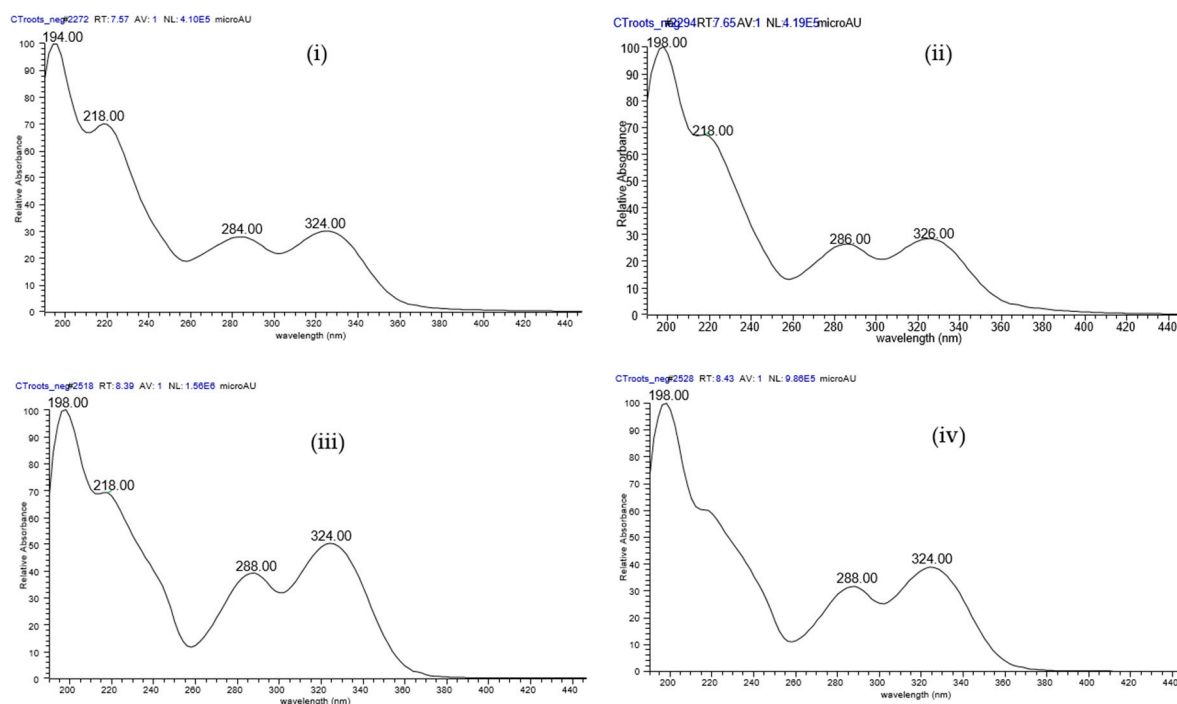

**Figure S1.** UV spectra of compound 17 (i), compound 18 (ii), compound 23 (iii) and compound 24 (iv)

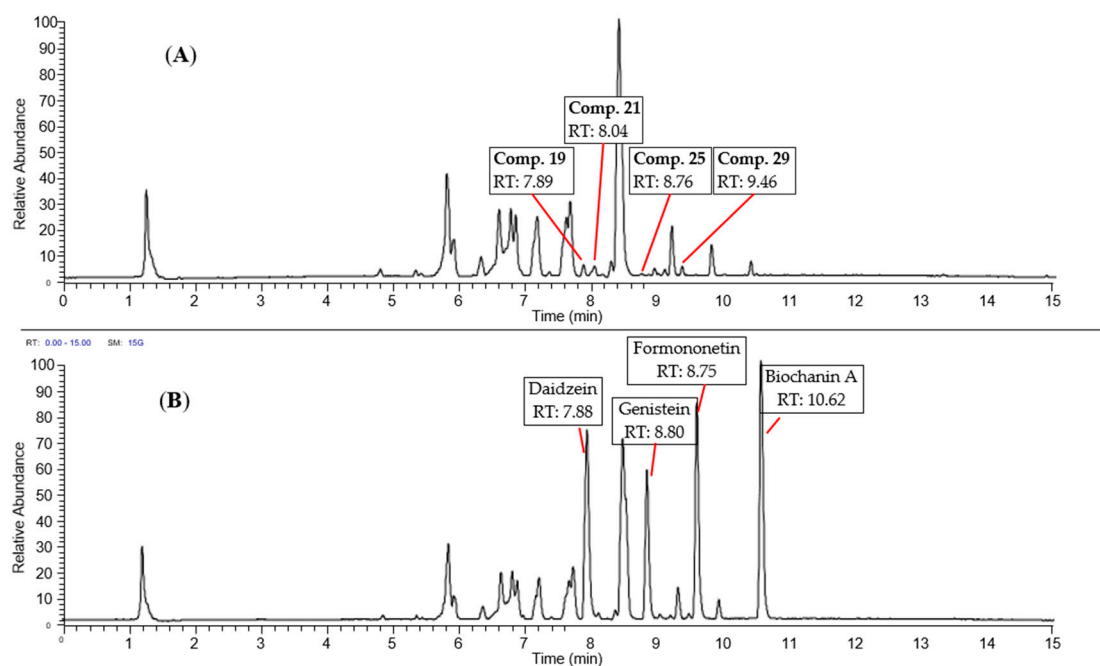

**Figure S2.** Comparison between the mass spectra of crude root extract (A) and crude root extract spiked with isoflavones standards (B).

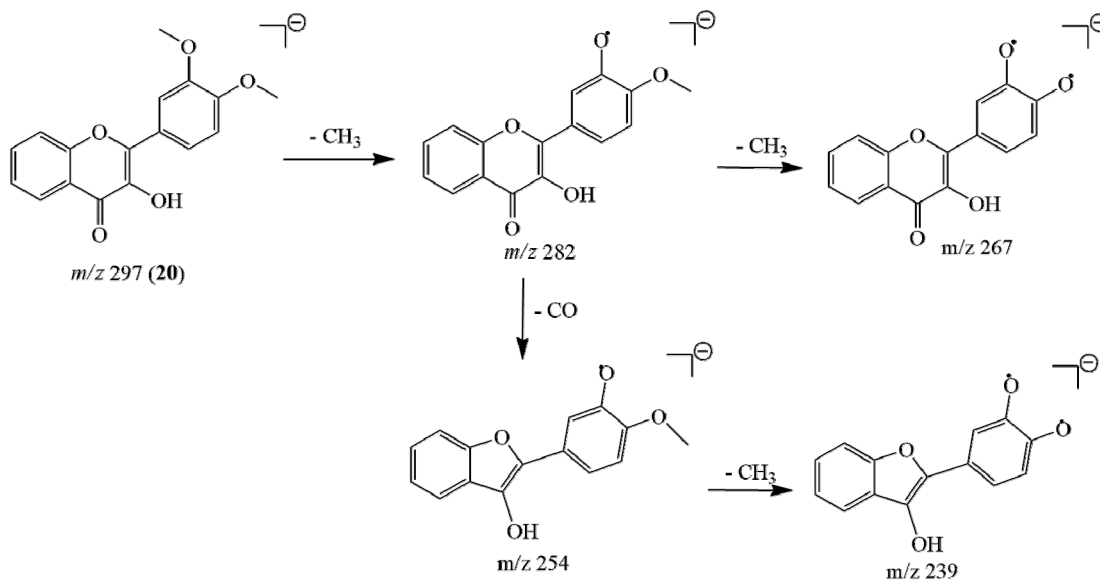

**Figure S3.** Proposed fragmentation pathway of compound 20 (3',4'-dimethoxyflavonol).

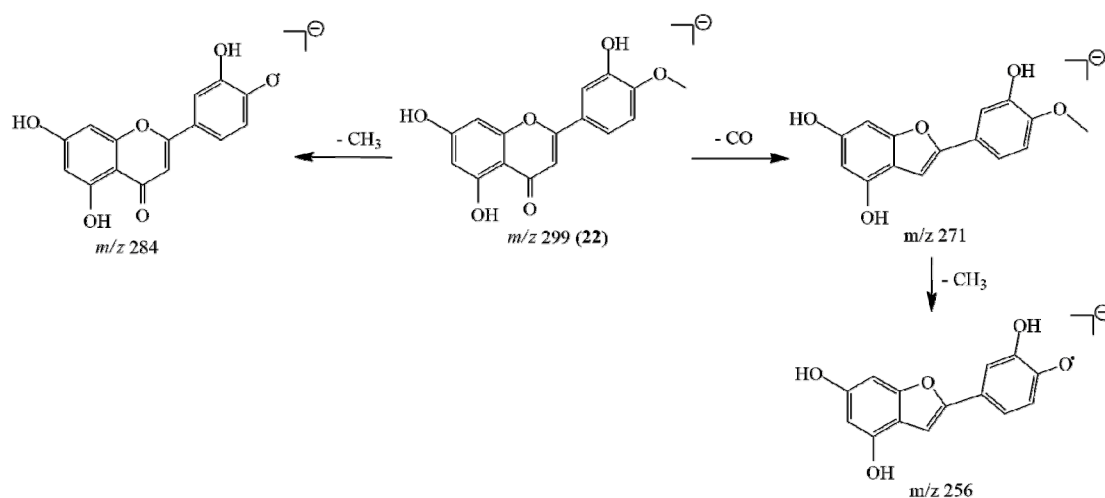

**Figure S4.** Proposed fragmentation pathway of compound 22 (Diosmetin).

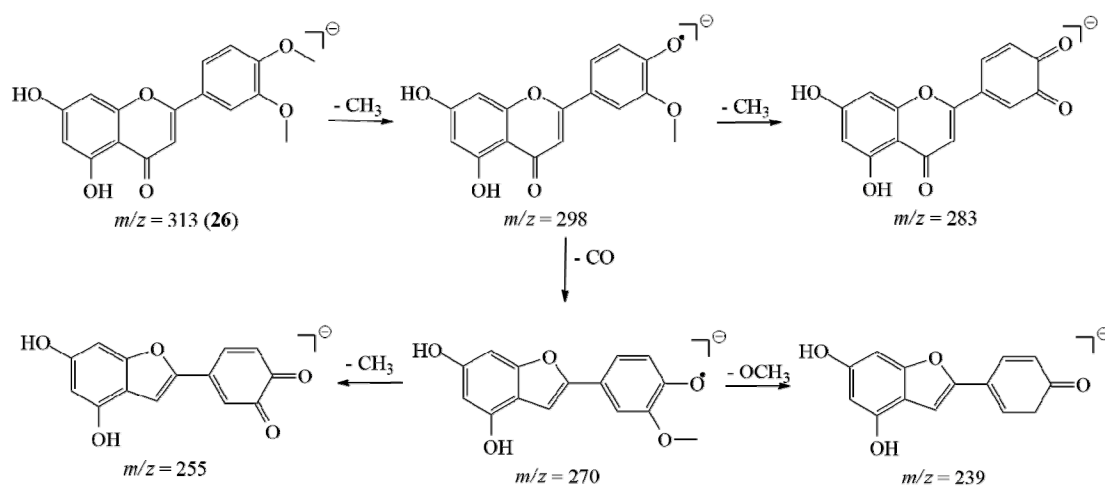

**Figure S5.** Proposed fragmentation pathway of compound 26 (luteolin-3',4'-dimethyl ether).

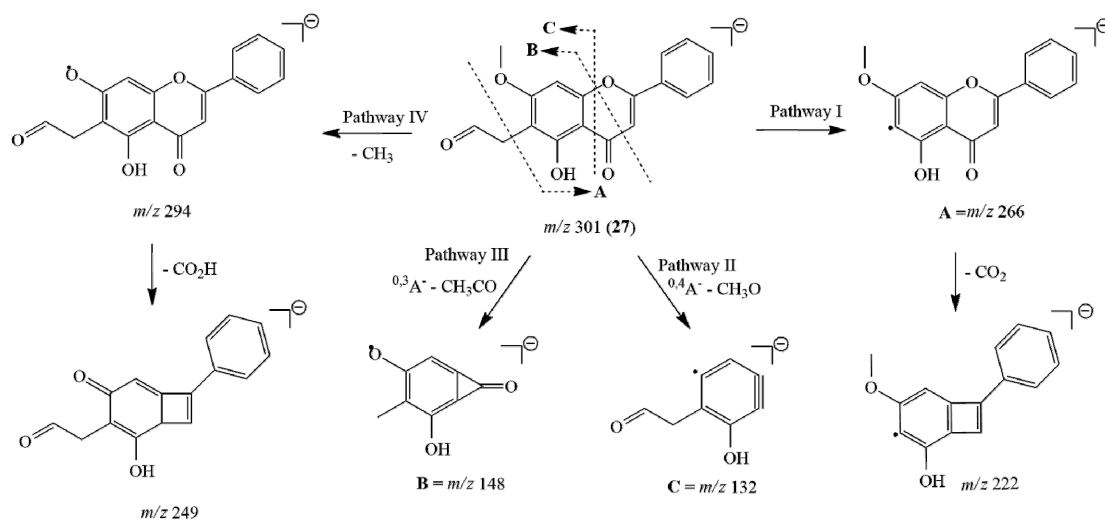

Figure S6. Proposed fragmentation pathway of compound 27 (Hoslundal).

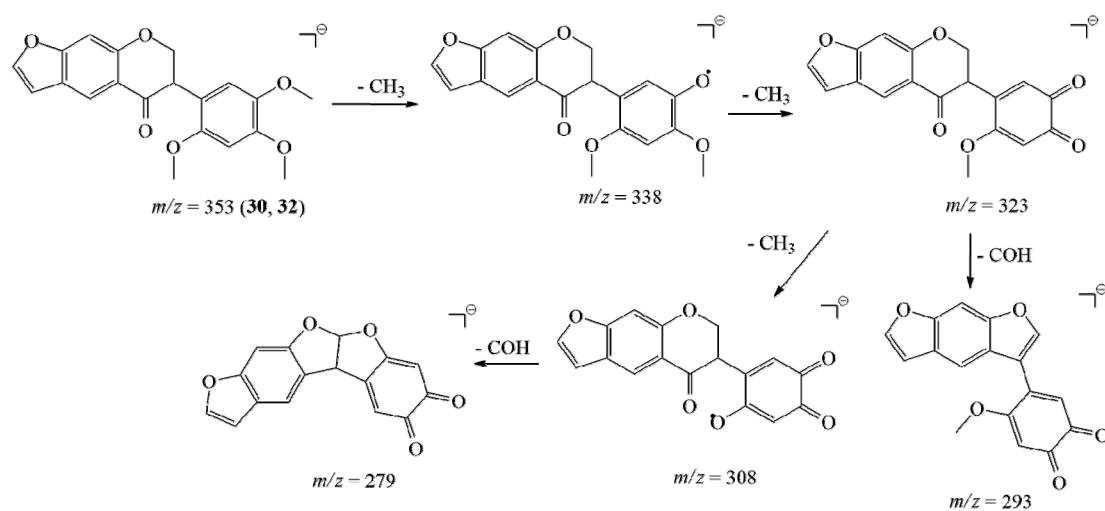

Figure S7. Proposed fragmentation pathway of compound 29 & 31 (Ambanone and its isomer).

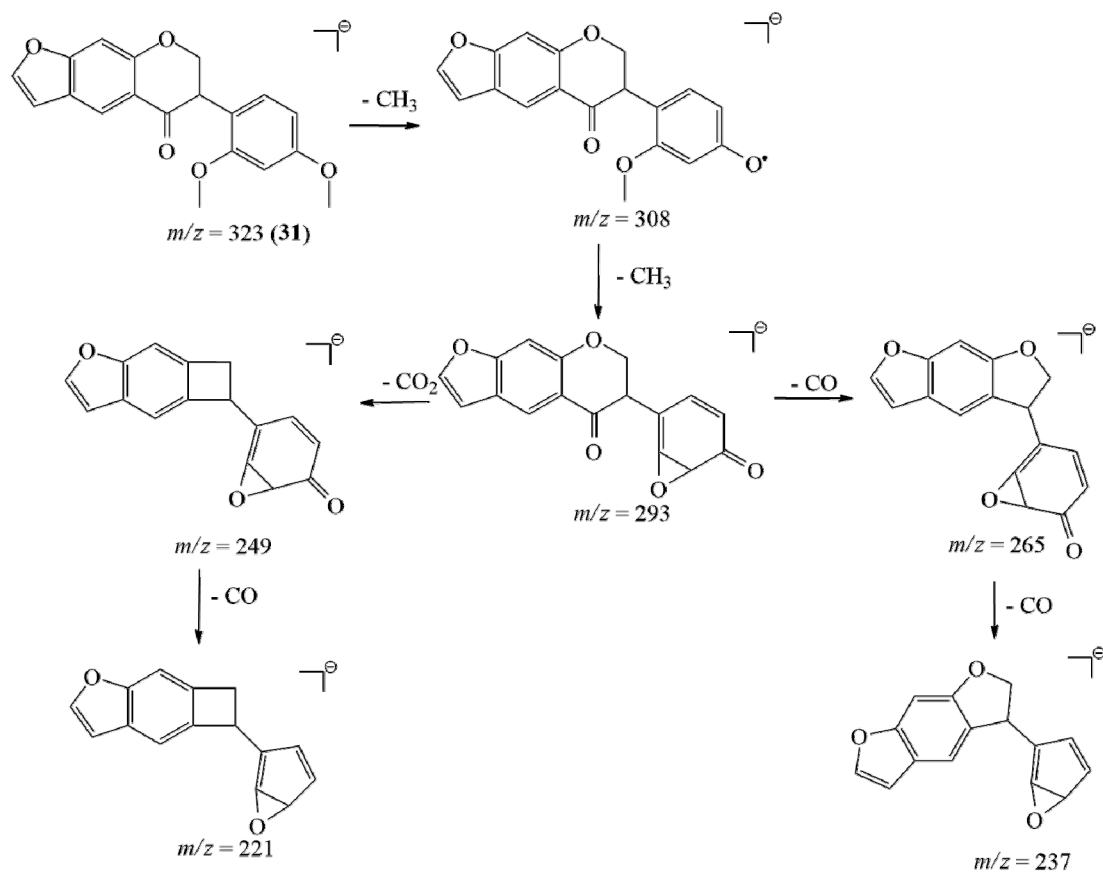

**Figure S8.** Proposed fragmentation pathway of compound 30 (Neoraunone).

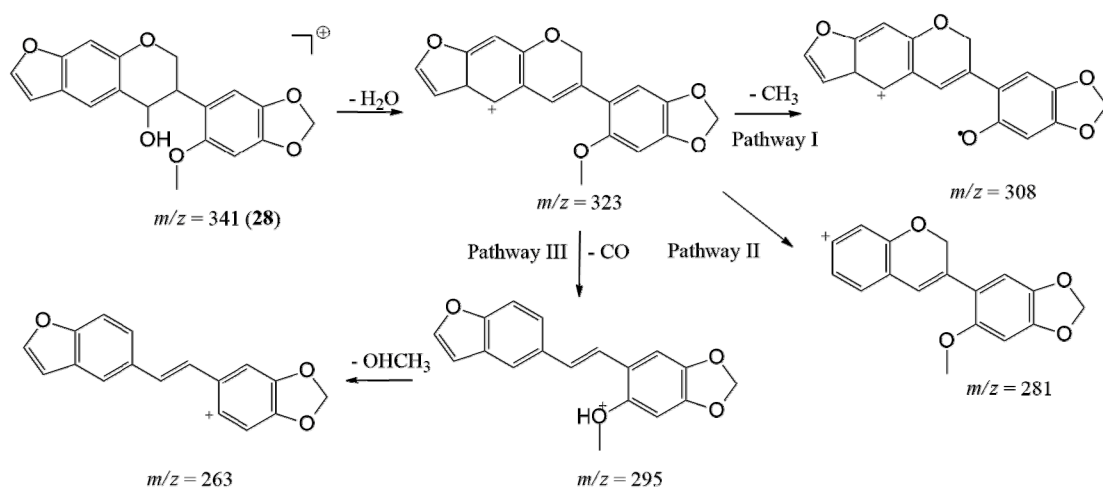

**Figure S9.** Proposed fragmentation pathway of compound 28 (Ambanol).

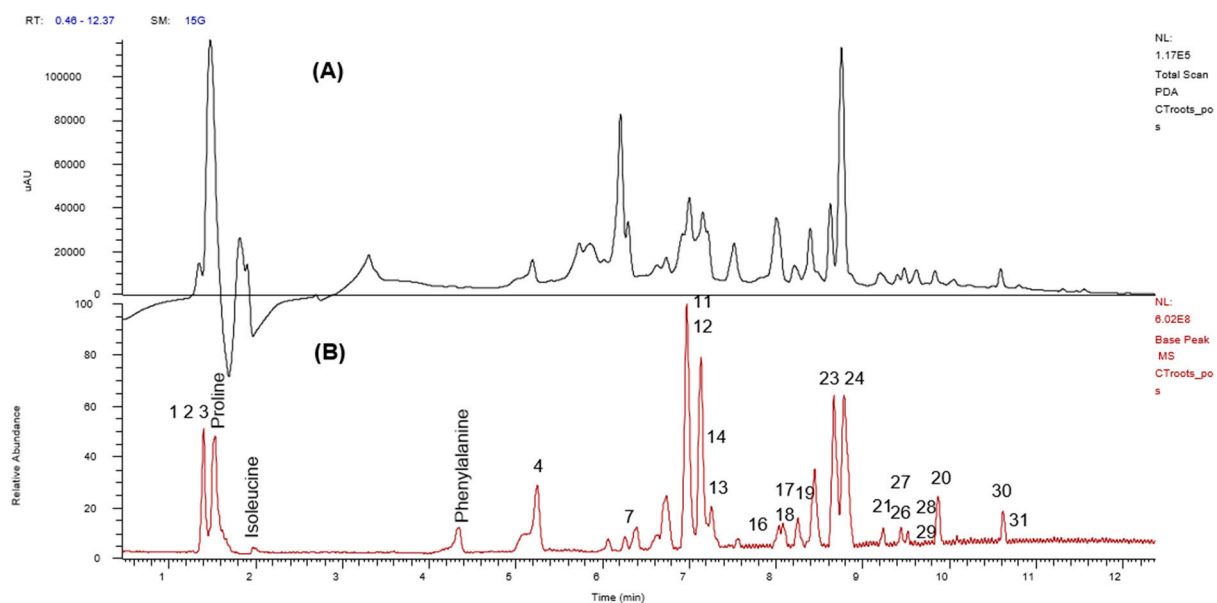

**Figure S10.** (A) LC-DAD and (B) LC-MS base peak chromatogram profiles of *Clitorea ternatea* crude root extract in positive mode.

Table S1. Metabolite profiles of *Clitoria ternatea* root extract in positive MS/MS.

| No                             | Retention time (RT) (min) | Parent ion experimental (m/z) | Parent ion theoretical (m/z) | Error (ppm) | MS/MS fragment ions (intensity, %)                                                                                                | Tentative identification            | Molecular formula                                             | Source     |
|--------------------------------|---------------------------|-------------------------------|------------------------------|-------------|-----------------------------------------------------------------------------------------------------------------------------------|-------------------------------------|---------------------------------------------------------------|------------|
| Amino acids & Carboxylic acids |                           |                               |                              |             |                                                                                                                                   |                                     |                                                               |            |
| 1                              | 1.41                      | 156.0751                      | 156.0773                     | −14.09      | 156 (25), 138 (2), 110 (100), 95 (5), 83 (3)                                                                                      | Histidine                           | C <sub>6</sub> H <sub>9</sub> N <sub>3</sub> O <sub>2</sub>   | [45]       |
| 2                              | 1.4                       | 175.1169                      | 175.1195                     | −14.85      | 175 (100), 158 (19), 157 (5), 130 (22), 116 (57), 112 (6) 70 (84), 60 (61)                                                        | Arginine                            | C <sub>6</sub> H <sub>14</sub> N <sub>4</sub> O <sub>2</sub>  | [45,46]    |
| 3                              | 1.4                       | 133.0593                      | 133.0613                     | −15.03      | 133 (17), 116 (17), 88 (16), 87 (61), 75 (1), 74 (100), 70 (4)                                                                    | Asparagine                          | C <sub>4</sub> H <sub>8</sub> N <sub>2</sub> O <sub>3</sub>   | [45]       |
| -                              | 1.54                      | 116.0695                      | 116.0711                     | −13.78      | 116 (34), 70 (100)                                                                                                                | Proline                             | C <sub>5</sub> H <sub>9</sub> NO <sub>2</sub>                 | [45,46]    |
| -                              | 1.97                      | 132.1005                      | 132.1024                     | −14.38      | 132 (3), 113 (3), 87 (4), 86 (100), 72 (5), 69 (7)                                                                                | Isoleucine                          | C <sub>6</sub> H <sub>13</sub> NO <sub>2</sub>                | [45,47]    |
| -                              | 4.36                      | 166.0844                      | 166.0868                     | −14.45      | 166 (4), 149 (1), 131 (3), 121 (6), 120 (100), 103 (3), 84 (12)                                                                   | Phenylalanine                       | C <sub>9</sub> H <sub>11</sub> NO <sub>2</sub>                | [39,40,45] |
| 4                              | 5.23                      | 205.0947                      | 205.0977                     | −14.63      | 188 (100), 159 (8), 146 (58), 144 (10), 132 (4), 118 (7)                                                                          | Tryptophan                          | C <sub>11</sub> H <sub>12</sub> N <sub>2</sub> O <sub>2</sub> | [45]       |
| Free Clitorienolactones        |                           |                               |                              |             |                                                                                                                                   |                                     |                                                               |            |
| 17                             | 8.07                      | 299.0877                      | 299.0919                     | −14.04      | 299 (18), 281 (12), 253 (22), 239 (13), 193 (4), 107 (100)                                                                        | Clitorienolactone D                 | C <sub>17</sub> H <sub>14</sub> O <sub>5</sub>                | [22]       |
| 18                             | 8.08                      | 329.0979                      | 329.1025                     | −13.98      | 329 (3), 251 (2), 205 (2), 177 (2) 138 (6), 137 (100)                                                                             | Clitorienolactone C                 | C <sub>18</sub> H <sub>16</sub> O <sub>6</sub>                | [22]       |
| 23                             | 8.78                      | 313.1033                      | 313.1076                     | −13.73      | 313 (66), 295 (64), 267 (65), 253 (100), 236 (15), 207 (12), 147 (16), 107 (58)                                                   | Clitorienolactone B                 | C <sub>18</sub> H <sub>16</sub> O <sub>5</sub>                | [22]       |
| 24                             | 8.83                      | 343.1134                      | 343.1181                     | −13.70      | 343 (21), 325 (11), 283 (10), 265 (7), 219 (17), 201 (7), 177 (14), 175 (7), 137 (100)                                            | Clitorienolactone A                 | C <sub>19</sub> H <sub>18</sub> O <sub>6</sub>                | [22]       |
| Clitorienolactone glycosides   |                           |                               |                              |             |                                                                                                                                   |                                     |                                                               |            |
| 7                              | 6.26                      | 637.2047                      | 637.2132                     | −13.33      | Y <sub>1</sub> <sup>+</sup> : 475 (100), Y <sub>0</sub> <sup>+</sup> : 313 (74), 295 (47), 267 (41), 253 (49), 207 (10), 107 (19) | Clitorienolactone B 4-O-di-hexoside | C <sub>30</sub> H <sub>36</sub> O <sub>15</sub>               | -          |

|                      |       |          |          |        |                                                                                                               |                                  |                                                 |      |
|----------------------|-------|----------|----------|--------|---------------------------------------------------------------------------------------------------------------|----------------------------------|-------------------------------------------------|------|
| 11                   | 7.03  | 461.1385 | 461.1448 | −13.66 | 461(2), Y <sub>0</sub> <sup>+</sup> : 299 (50), 281 (11), 253 (13), 107 (100)                                 | Clitorienolactone D 4-O-hexoside | C <sub>23</sub> H <sub>24</sub> O <sub>10</sub> | -    |
| 12                   | 7.08  | 491.1489 | 491.1553 | −13.03 | 491 (0.3), Y <sub>0</sub> <sup>+</sup> : 329 (17), 251 (1), 205 (2), 177 (1), 137 (100)                       | Clitorienolactone C 4-O-hexoside | C <sub>24</sub> H <sub>26</sub> O <sub>11</sub> | -    |
| 13                   | 7.25  | 505.1642 | 505.1710 | −13.46 | 505 (18), Y <sub>0</sub> <sup>+</sup> : 343 (35), 325 (16), 283 (10), 219 (18), 177 (14), 137 (100)           | Clitorienolactone A 4-O-hexoside | C <sub>25</sub> H <sub>28</sub> O <sub>11</sub> | -    |
| 14                   | 7.20  | 475.1542 | 475.1604 | −13.05 | 475 (48), Y <sub>0</sub> <sup>+</sup> : 313 (100), 295 (55), 267 (51), 253 (73), 207 (14), 147 (11), 107 (32) | Clitorienolactone B 4-O-hexoside | C <sub>24</sub> H <sub>26</sub> O <sub>10</sub> | -    |
| Flavonoid aglycones  |       |          |          |        |                                                                                                               |                                  |                                                 |      |
| 19                   | 8.31  | 255.0621 | 255.0657 | −14.11 | 255 (100), 227 (2), 213 (1), 199 (5), 137 (3)                                                                 | Daidzein                         | C <sub>15</sub> H <sub>10</sub> O <sub>4</sub>  | [41] |
| 20                   | 9.89  | 299.0878 | 299.0920 | −14.04 | 299 (100), 284 (12), 243 (2)                                                                                  | 3',4'-dimethoxyflavonol          | C <sub>17</sub> H <sub>14</sub> O <sub>5</sub>  | -    |
| 21                   | 9.25  | 285.0723 | 285.0763 | −14.03 | 285 (100), 243 (2), 229 (5), 215 (16), 187 (4), 151 (6)                                                       | Glycitein                        | C <sub>16</sub> H <sub>12</sub> O <sub>5</sub>  | -    |
| 26                   | 9.46  | 315.0826 | 315.0868 | −13.33 | 315 (100), 300 (4), 255 (4), 175 (5), 167 (6)                                                                 | Luteolin-3',4'-dimethyl ether    | C <sub>17</sub> H <sub>14</sub> O <sub>6</sub>  | -    |
| 27                   | 9.54  | 311.0876 | 311.0919 | −13.82 | 311 (100), 293 (9), 278 (3), 265 (7), 151 (4), 121 (36)                                                       | Hoslundal                        | C <sub>18</sub> H <sub>14</sub> O <sub>5</sub>  | -    |
| 28                   | 9.66  | 341.0979 | 341.1025 | −13.48 | 341 (100), 323 (5), 308 (8), 295 (4), 281 (9), 263 (9), 235 (5), 121 (30)                                     | Ambanol                          | C <sub>19</sub> H <sub>16</sub> O <sub>6</sub>  | -    |
| 29                   | 9.79  | 269.0777 | 269.0814 | −13.75 | 269 (100), 254 (3), 237 (1), 213 (3), 151 (1), 107 (1)                                                        | Formononetin                     | C <sub>16</sub> H <sub>12</sub> O <sub>4</sub>  | -    |
| 30                   | 10.64 | 355.1134 | 355.1182 | −13.52 | 355 (100), 337 (8), 324 (7), 322 (4), 295 (4), 278 (7), 121 (33)                                              | Ambonone                         | C <sub>20</sub> H <sub>18</sub> O <sub>6</sub>  | -    |
| 31                   | 10.82 | 325.1030 | 325.1076 | −14.15 | 325 (100), 307 (13), 292 (6), 279 (8), 264 (5), 248 (4), 121 (38)                                             | Neoraunone                       | C <sub>19</sub> H <sub>16</sub> O <sub>5</sub>  | -    |
| Flavonoid glycosides |       |          |          |        |                                                                                                               |                                  |                                                 |      |
| 16                   | 7.88  | 447.1234 | 447.1291 | −12.75 | 447 (14), Y <sub>0</sub> <sup>+</sup> : 285 (100), 215 (7), 151 (3)                                           | Glycitin                         | C <sub>22</sub> H <sub>22</sub> O <sub>10</sub> | -    |



**Table S2.** Yield of aqueous, ethyl acetate, 50% methanol and hexane fractions from SPE.

| Fractions     | Yield (mg) |
|---------------|------------|
| Aqueous       | 65         |
| Ethyl acetate | 143        |
| 50% methanol  | 398        |
| Hexane        | 47         |
